# Supplementary material for: A label-free fluorescence sensing platform based on NaY0.47F4:Ce0.1,Gd0.4,Eu0.03@PEIF down-conversion for selective detection of Cu2+ in aqueous environments
Source: Royal Society of Chemistry journal article supplement (doi:10.1039/d5ay00238a), 2025-01-01
Supplement: d5ay00238a7.pdf [file d5ay00238a7.pdf]

## Supporting information

### **A label-free fluorescence sensing platform based on NaY<sub>0.47</sub>F<sub>4</sub>:Ce<sub>0.1</sub>,Gd<sub>0.4</sub>,Eu<sub>0.03</sub>@PEIF down-conversion for selective detection of Cu<sup>2+</sup> in aqueous environments**

Dongxu Yan<sup>a</sup>, Wen Yao<sup>b</sup>, Siwei Chen<sup>a</sup>, Xinrong Guo<sup>b\*</sup>, Lishi Wang<sup>a\*</sup>

---

a: School of Chemistry and Chemical Engineering, South China University of Technology, Guangzhou 510641, People's Republic of China. Tel: +86 020 87112906.

b: School of Public Health, Guangdong Medical University, Dongguan 523808, China.

E-mail address: [guoxinr@gdmu.edu.cn](mailto:guoxinr@gdmu.edu.cn)

E-mail address: [wanglsh@scut.edu.cn](mailto:wanglsh@scut.edu.cn)

## **Table of Contents**

- 1. Reaction principles and characterization of PEIF.**
- 2. Distribution of elements in Eu NPs and Eu@PEIF NPs.**
- 3. UV absorption of PEIF mixed with Cu<sup>2+</sup>.**
- 4. Analysis of the quenching mechanis.**
- 5. Selectivity to Cu<sup>2+</sup>.**
- 6. The detection of Cu<sup>2+</sup> in an actual sample.**

## 1. Reaction principles and characterization of PEIF

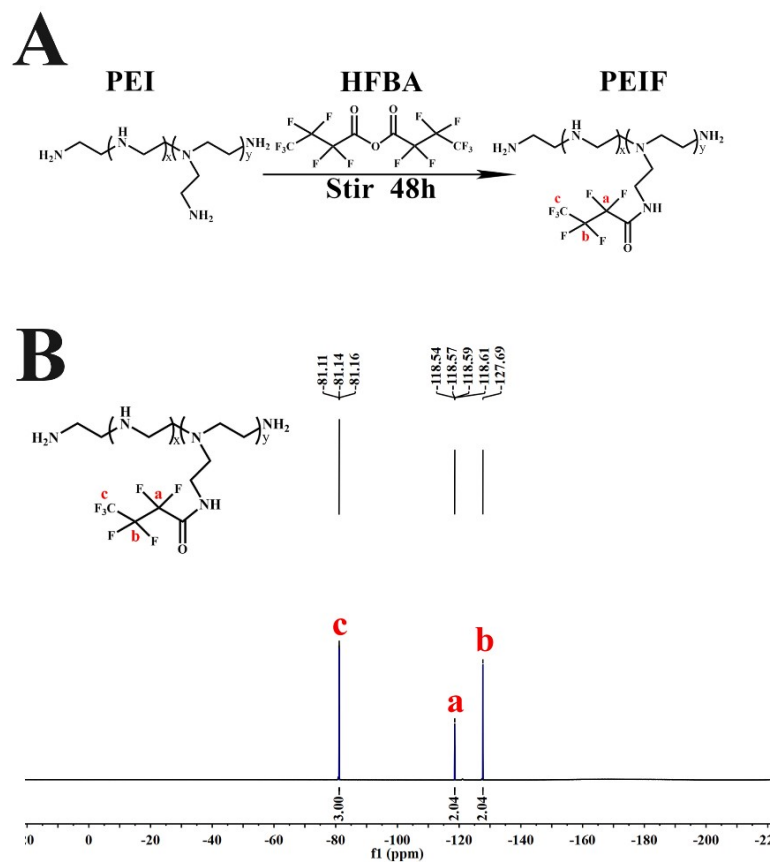

Fig. S1 (A) PEIF reaction equation (B) PEIF  $^1\text{F}$  NMR spectra

## 2. Distribution of elements in Eu NPs and Eu@PEIF NPs

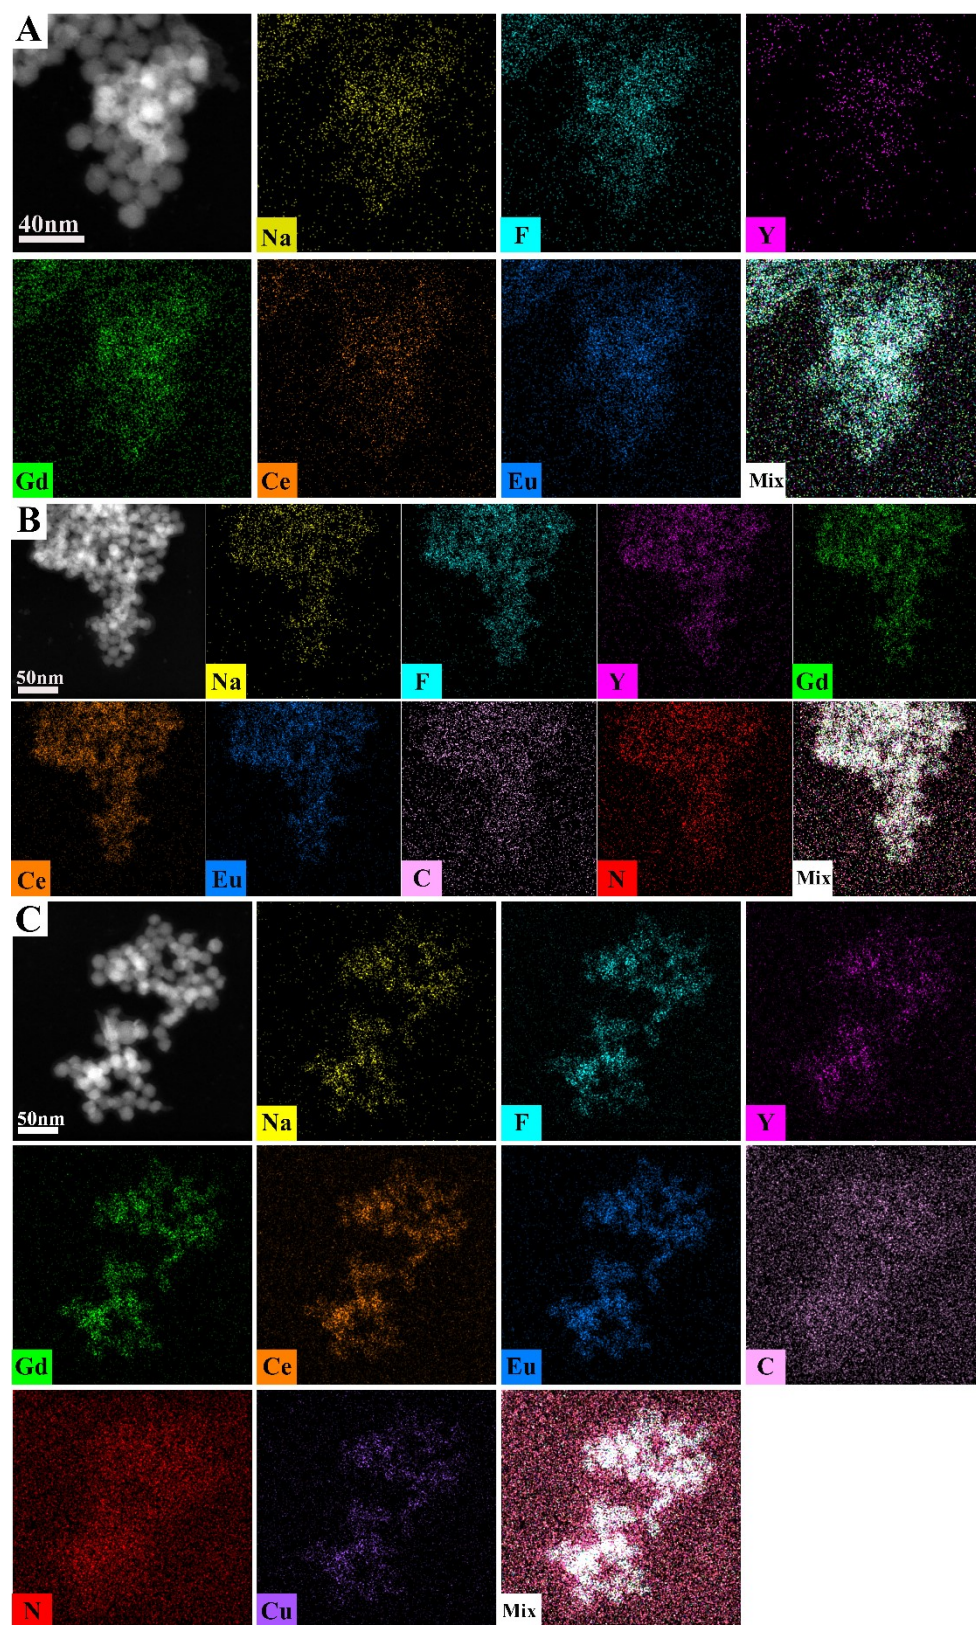

Fig. S2 (A) Eu NPs EDS mapping. (B) Eu@PEIF NPs EDS mapping. (C) Eu@PEIF NPs after addition of Cu<sup>2+</sup> EDS mapping

**Table S1 Element atomic fraction of Eu NPs, Eu@PEIF NPs and Eu@PEIF NPs+Cu<sup>2+</sup>**

|                              | Na(%) | F(%)  | Y(%)  | Gd(%) | Ce(%) | Eu(%) | C(%)  | N(%) | Cu(%) |
|------------------------------|-------|-------|-------|-------|-------|-------|-------|------|-------|
| Eu NPs                       | 10.28 | 69.21 | 12.83 | 5.74  | 1.52  | 0.42  | -     | -    | -     |
| Eu@PEIF NPs                  | 2.43  | 24.44 | 3.71  | 1.60  | 0.34  | 0.15  | 64.04 | 3.29 | -     |
| Eu@PEIF NPs+Cu <sup>2+</sup> | 0.79  | 9.54  | 0.82  | 0.45  | 0.12  | 0.03  | 83.90 | 1.85 | 2.5   |

### 3. UV absorption of PEIF mixed with Cu<sup>2+</sup>

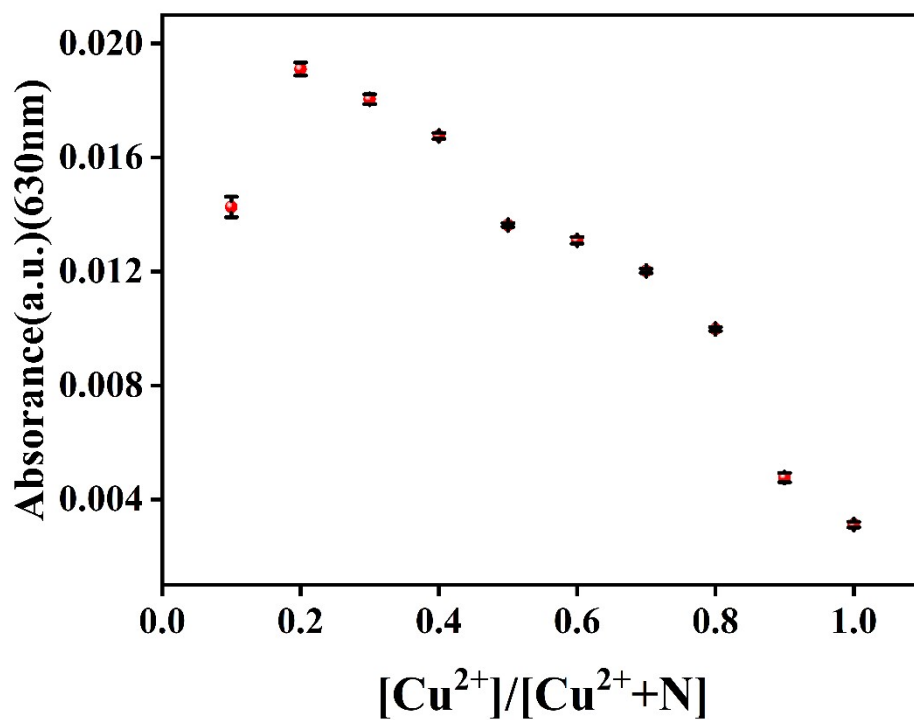

Fig. S3 UV absorption of Cu<sup>2+</sup> and PEIF mixtures located at 630 nm at different proportional concentrations

#### 4. Analysis of the quenching mechanism

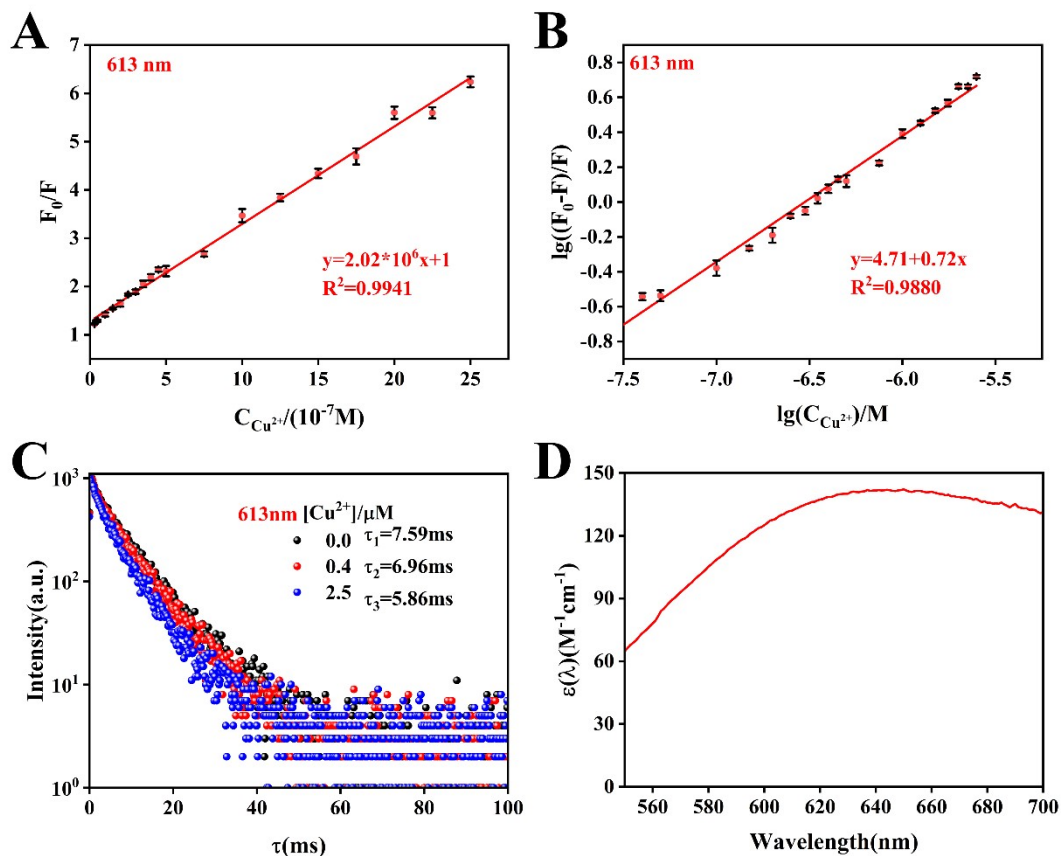

Fig. S4 (A) Linear fitting plot of  $F_0/F$  at 613 nm. (B) The double logarithmic curve at 613 nm. (C) Fluorescence lifetimes of Eu@PEIF NPs located at 613 nm after addition of different concentrations of Cu<sup>2+</sup>. (D) Molar absorptance absorption of 550 nm-700 nm PEIF with Cu<sup>2+</sup> complex.

#### 5. Selectivity to Cu<sup>2+</sup>



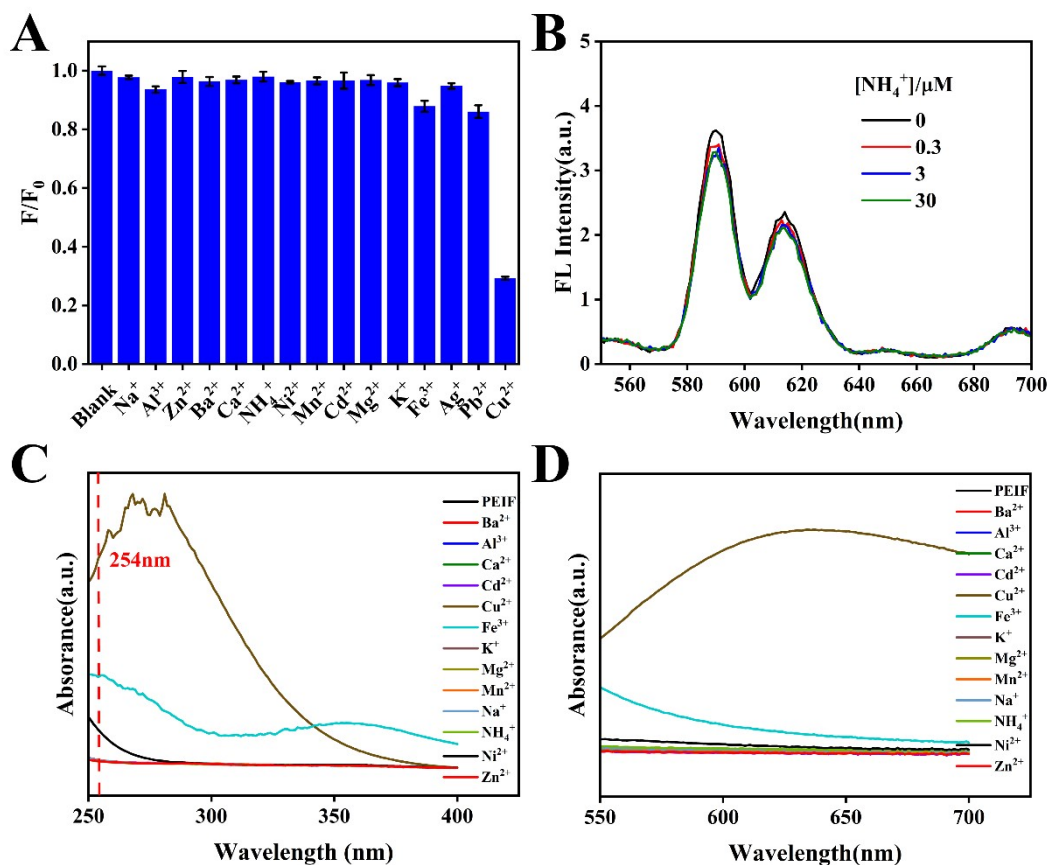

Fig. S5 (A) Fluorescence changes of Eu@PEIF NPs after individual addition of a certain amount of interfering ion ( $\text{Na}^+$ ,  $\text{Al}^{3+}$ ,  $\text{Zn}^{2+}$ ,  $\text{Ba}^{2+}$ ,  $\text{Ca}^{2+}$ ,  $\text{NH}_4^+$ ,  $\text{Ni}^{2+}$ ,  $\text{Mn}^{2+}$ ,  $\text{Cd}^{2+}$ ,  $\text{Mg}^{2+}$ ,  $\text{K}^+$  and  $\text{Fe}^{3+}$  all at a concentration of 100  $\mu\text{M}$ , and  $\text{Cu}^{2+}$  at a concentration of 0.5  $\mu\text{M}$ ). (B) Fluorescence changes of Eu@PEIF NPs after addition of a certain amount of  $\text{Cu}^{2+}$  with different concentrations of  $\text{NH}_4^+$ . UV absorption at (C) 250 nm-400 nm and (D) 550 nm- 700 nm of different ions mixed with PEIF at the same concentration.

## 6. The detection of $\text{Cu}^{2+}$ in an actual sample

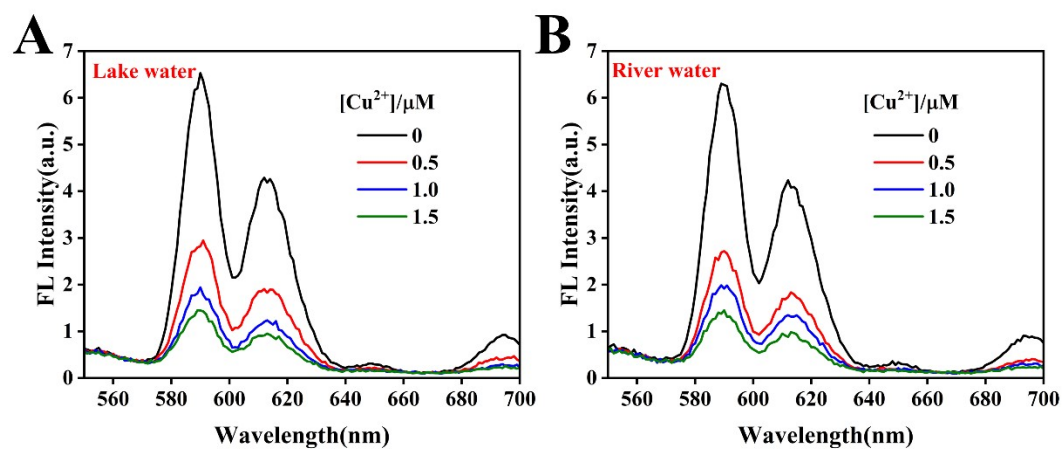

Fig. S6 Spectra of Eu@PEIF NPs after adding different concentrations of  $\text{Cu}^{2+}$  in (A) lake water and (B) river water
