# Supplementary figures and images for: A label-free fluorescence sensing platform based on NaY0.47F4:Ce0.1,Gd0.4,Eu0.03@PEIF down-conversion for selective detection of Cu2+ in aqueous environments
Source: Royal Society of Chemistry journal article supplement (doi:10.1039/d5ay00238a), 2025-01-01

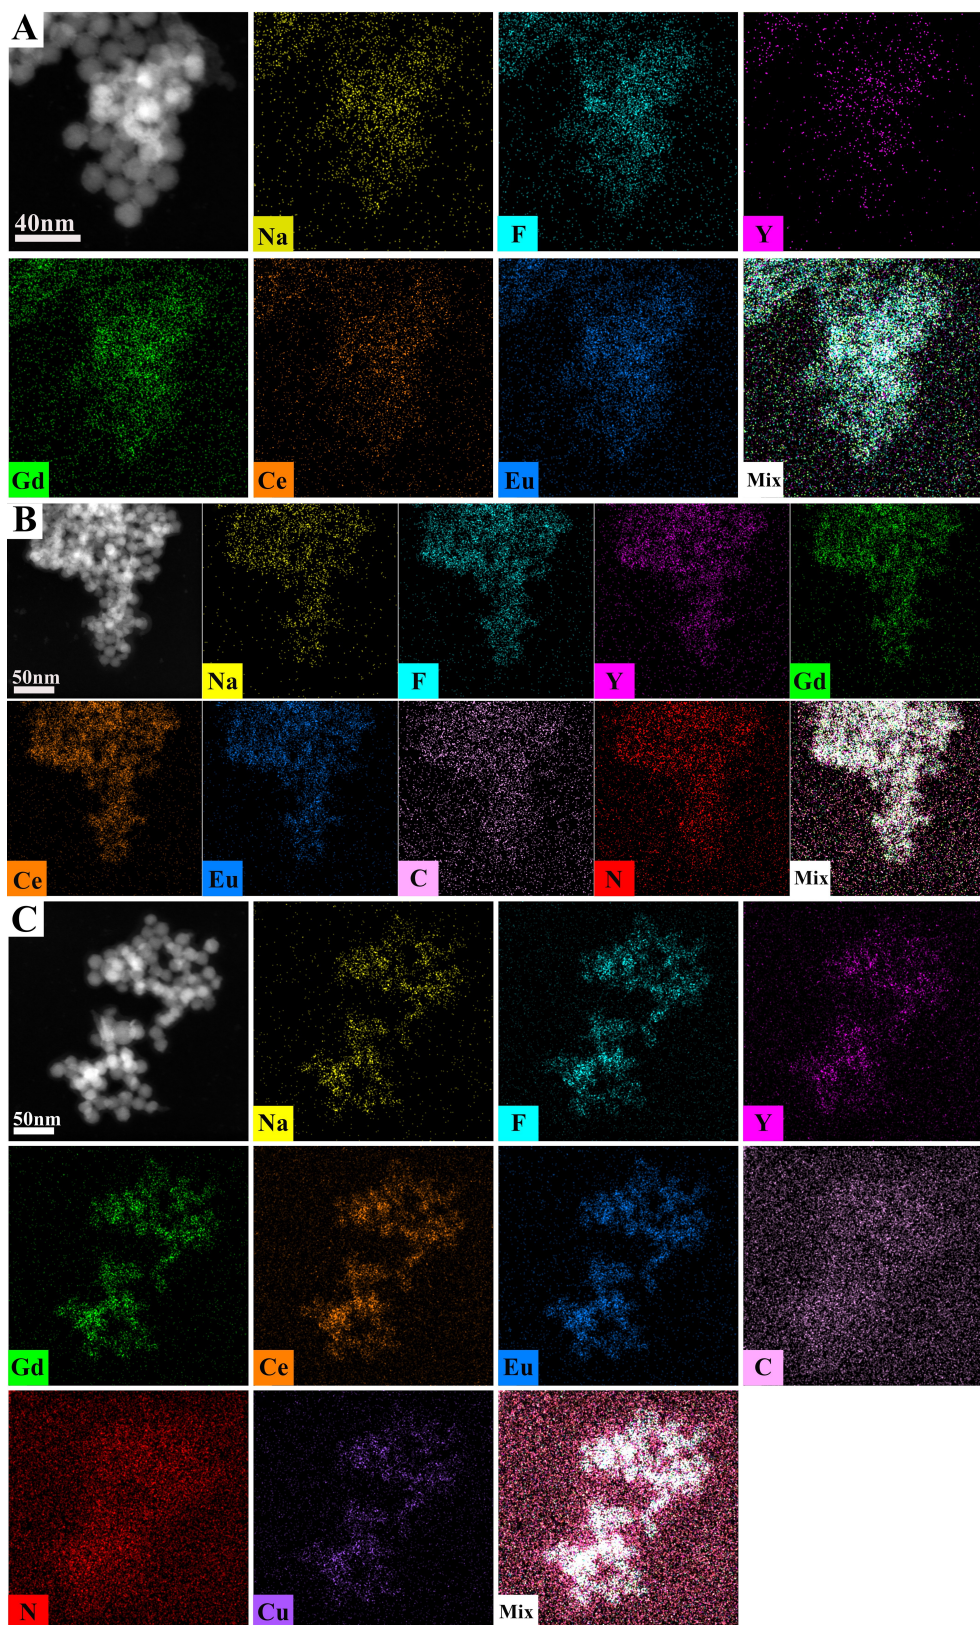

Supplement: d5ay00238a2.pdf [file d5ay00238a2.pdf]

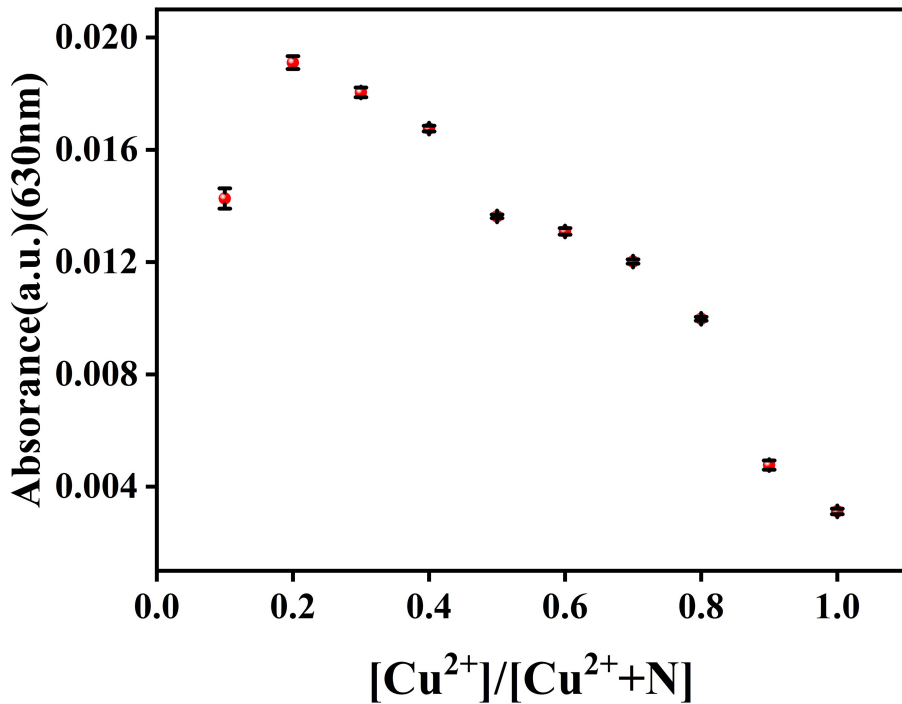

Supplement: d5ay00238a3.pdf [file d5ay00238a3.pdf]
